# Supplementary material for: The Influence of HLA Polymorphisms on the Severity of COVID-19 in the Romanian Population
Source: MDPI journal article supplement (doi:10.3390/ijms25021326), 2024-01-22
Supplement: s1 [file s1]

## Contents

|                                                    |    |
|----------------------------------------------------|----|
| Comparison between severe and control groups ..... | 1  |
| Within severe group.....                           | 4  |
| Comparison concerning deceased status .....        | 4  |
| Comparison concerning diseased or ICU status.....  | 6  |
| Comparisons concerning oxygen therapy .....        | 9  |
| Multiple logistic regressions.....                 | 12 |

## Comparison between severe and control groups

**Supplementary Table S1.** Univariate logistic regression analysis predicting the odds of severe disease based on HLA-A alleles

| Group:     | Severe<br>(n=260) | Control<br>(n=318) | OR (95% CI), P-value             |
|------------|-------------------|--------------------|----------------------------------|
| A*01 n (%) | 41 (15.77)        | 54 (16.98)         | 0.92 (95% CI 0.59 - 1.43), 0.696 |
| A*02 n (%) | 77 (29.62)        | 70 (22.01)         | 1.49 (95% CI 1.02 - 2.17), 0.037 |
| A*03 n (%) | 27 (10.38)        | 43 (13.52)         | 0.74 (95% CI 0.44 - 1.24), 0.25  |
| A*11 n (%) | 17 (6.54)         | 30 (9.43)          | 0.67 (95% CI 0.36 - 1.25), 0.205 |
| A*23 n (%) | 3 (1.15)          | 3 (0.94)           | 1.23 (95% CI 0.25 - 6.12), 1     |
| A*24 n (%) | 35 (13.46)        | 36 (11.32)         | 1.22 (95% CI 0.74 - 2), 0.435    |
| A*25 n (%) | 4 (1.54)          | 8 (2.52)           | 0.61 (95% CI 0.18 - 2.03), 0.412 |
| A*26 n (%) | 14 (5.38)         | 14 (4.4)           | 1.24 (95% CI 0.58 - 2.64), 0.584 |
| A*29 n (%) | 1 (0.38)          | 6 (1.89)           | 0.2 (95% CI 0.02 - 1.68), 0.136  |
| A*30 n (%) | 10 (3.85)         | 13 (4.09)          | 0.94 (95% CI 0.4 - 2.18), 0.882  |
| A*31 n (%) | 7 (2.69)          | 8 (2.52)           | 1.07 (95% CI 0.38 - 3), 0.894    |
| A*32 n (%) | 13 (5)            | 12 (3.77)          | 1.34 (95% CI 0.6 - 2.99), 0.471  |
| A*33 n (%) | 1 (0.38)          | 11 (3.46)          | 0.11 (95% CI 0.01 - 0.84), 0.01  |
| A*66 n (%) | 1 (0.38)          | 2 (0.63)           | 0.61 (95% CI 0.06 - 6.77), 1     |
| A*68 n (%) | 5 (1.92)          | 7 (2.2)            | 0.87 (95% CI 0.27 - 2.78), 0.815 |
| A*69 n (%) | 3 (1.15)          | 1 (0.31)           | 3.7 (95% CI 0.38 - 35.79), 0.331 |
| A*74 n (%) | 1 (0.38)          | 0 (0)              | Inf (95% CI NC - Inf), 0.45      |

n for groups, number of alleles; HLA, human leukocyte antigen; OR, odds ratio; CI, confidence interval; NC, cannot be computed.

**Supplementary Table S2.** Univariate logistic regression analysis predicting the odds of severe disease based on HLA-B alleles

| Group:     | Severe<br>(n=260) | Control<br>(n=318) | OR (95% CI), P-value             |
|------------|-------------------|--------------------|----------------------------------|
| B*07 n (%) | 18 (6.92)         | 11 (3.46)          | 2.08 (95% CI 0.96 - 4.48), 0.058 |

|            |            |            |                                   |
|------------|------------|------------|-----------------------------------|
| B*08 n (%) | 26 (10)    | 31 (9.75)  | 1.03 (95% CI 0.59 - 1.78), 0.92   |
| B*13 n (%) | 8 (3.08)   | 8 (2.52)   | 1.23 (95% CI 0.46 - 3.32), 0.682  |
| B*14 n (%) | 4 (1.54)   | 9 (2.83)   | 0.54 (95% CI 0.16 - 1.76), 0.297  |
| B*15 n (%) | 13 (5)     | 10 (3.14)  | 1.62 (95% CI 0.7 - 3.76), 0.256   |
| B*18 n (%) | 28 (10.77) | 29 (9.12)  | 1.2 (95% CI 0.7 - 2.08), 0.508    |
| B*27 n (%) | 22 (8.46)  | 14 (4.4)   | 2.01 (95% CI 1.01 - 4.01), 0.045  |
| B*35 n (%) | 30 (11.54) | 54 (16.98) | 0.64 (95% CI 0.39 - 1.03), 0.065  |
| B*37 n (%) | 1 (0.38)   | 2 (0.63)   | 0.61 (95% CI 0.06 - 6.77), 1      |
| B*38 n (%) | 12 (4.62)  | 9 (2.83)   | 1.66 (95% CI 0.69 - 4.01), 0.254  |
| B*39 n (%) | 6 (2.31)   | 5 (1.57)   | 1.48 (95% CI 0.45 - 4.9), 0.554   |
| B*40 n (%) | 10 (3.85)  | 26 (8.18)  | 0.45 (95% CI 0.21 - 0.95), 0.032  |
| B*41 n (%) | 1 (0.38)   | 9 (2.83)   | 0.13 (95% CI 0.02 - 1.05), 0.027  |
| B*44 n (%) | 22 (8.46)  | 24 (7.55)  | 1.13 (95% CI 0.62 - 2.07), 0.686  |
| B*47 n (%) | 1 (0.38)   | 2 (0.63)   | 0.61 (95% CI 0.06 - 6.77), 1      |
| B*49 n (%) | 4 (1.54)   | 3 (0.94)   | 1.64 (95% CI 0.36 - 7.4), 0.706   |
| B*50 n (%) | 10 (3.85)  | 2 (0.63)   | 6.32 (95% CI 1.37 - 29.11), 0.007 |
| B*51 n (%) | 17 (6.54)  | 33 (10.38) | 0.6 (95% CI 0.33 - 1.11), 0.102   |
| B*52 n (%) | 12 (4.62)  | 16 (5.03)  | 0.91 (95% CI 0.42 - 1.97), 0.817  |
| B*53 n (%) | 1 (0.38)   | 0 (0)      | Inf (95% CI NC - Inf), 0.45       |
| B*55 n (%) | 5 (1.92)   | 6 (1.89)   | 1.02 (95% CI 0.31 - 3.38), 1      |
| B*56 n (%) | 2 (0.77)   | 4 (1.26)   | 0.61 (95% CI 0.11 - 3.35), 0.695  |
| B*57 n (%) | 7 (2.69)   | 5 (1.57)   | 1.73 (95% CI 0.54 - 5.52), 0.347  |
| B*58 n (%) | 0 (0)      | 6 (1.89)   | 0 (95% CI 0 - NC), 0.035          |

n for groups, number of alleles; HLA, human leukocyte antigen; OR, odds ratio; CI, confidence interval; NC, cannot be computed.

**Supplementary Table S3.** Univariate logistic regression analysis predicting the odds of severe disease based on HLA-C alleles

| Group:     | Severe<br>(n=260) | Control<br>(n=318) | OR (95% CI), P-value             |
|------------|-------------------|--------------------|----------------------------------|
| C*01 n (%) | 12 (4.62)         | 22 (6.92)          | 0.65 (95% CI 0.32 - 1.34), 0.242 |
| C*02 n (%) | 21 (8.08)         | 19 (5.97)          | 1.38 (95% CI 0.73 - 2.63), 0.322 |
| C*03 n (%) | 20 (7.69)         | 22 (6.92)          | 1.12 (95% CI 0.6 - 2.1), 0.721   |
| C*04 n (%) | 42 (16.15)        | 52 (16.35)         | 0.99 (95% CI 0.63 - 1.54), 0.949 |
| C*05 n (%) | 6 (2.31)          | 7 (2.2)            | 1.05 (95% CI 0.35 - 3.16), 0.932 |
| C*06 n (%) | 24 (9.23)         | 20 (6.29)          | 1.52 (95% CI 0.82 - 2.81), 0.185 |
| C*07 n (%) | 72 (27.69)        | 69 (21.7)          | 1.38 (95% CI 0.94 - 2.02), 0.095 |
| C*08 n (%) | 4 (1.54)          | 11 (3.46)          | 0.44 (95% CI 0.14 - 1.39), 0.149 |
| C*12 n (%) | 39 (15)           | 50 (15.72)         | 0.95 (95% CI 0.6 - 1.49), 0.811  |
| C*14 n (%) | 3 (1.15)          | 6 (1.89)           | 0.61 (95% CI 0.15 - 2.45), 0.524 |

|            |          |           |                                  |
|------------|----------|-----------|----------------------------------|
| C*15 n (%) | 8 (3.08) | 25 (7.86) | 0.37 (95% CI 0.16 - 0.84), 0.014 |
| C*16 n (%) | 9 (3.46) | 11 (3.46) | 1 (95% CI 0.41 - 2.45), 0.999    |
| C*17 n (%) | 0 (0)    | 4 (1.26)  | 0 (95% CI 0 - NC), 0.131         |

n for groups, number of alleles; HLA, human leukocyte antigen; OR, odds ratio; CI, confidence interval; NC, cannot be computed.

**Supplementary Table S4.** Univariate logistic regression analysis predicting the odds of severe disease based on HLA-DRB1 alleles

| <b>Group:</b> | <b>Severe<br/>(n=260)</b> | <b>Control<br/>(n=304)</b> | <b>OR (95% CI), P-value</b>       |
|---------------|---------------------------|----------------------------|-----------------------------------|
| DRB1*01 n (%) | 28 (10.77)                | 26 (8.55)                  | 1.29 (95% CI 0.74 - 2.26), 0.372  |
| DRB1*03 n (%) | 40 (15.38)                | 45 (14.8)                  | 1.05 (95% CI 0.66 - 1.66), 0.847  |
| DRB1*04 n (%) | 19 (7.31)                 | 28 (9.21)                  | 0.78 (95% CI 0.42 - 1.43), 0.415  |
| DRB1*07 n (%) | 33 (12.69)                | 31 (10.2)                  | 1.28 (95% CI 0.76 - 2.16), 0.352  |
| DRB1*08 n (%) | 6 (2.31)                  | 1 (0.33)                   | 7.16 (95% CI 0.86 - 59.84), 0.053 |
| DRB1*09 n (%) | 1 (0.38)                  | 1 (0.33)                   | 1.17 (95% CI 0.07 - 18.8), 1      |
| DRB1*10 n (%) | 3 (1.15)                  | 4 (1.32)                   | 0.88 (95% CI 0.19 - 3.95), 1      |
| DRB1*11 n (%) | 55 (21.15)                | 54 (17.76)                 | 1.24 (95% CI 0.82 - 1.89), 0.309  |
| DRB1*12 n (%) | 1 (0.38)                  | 5 (1.64)                   | 0.23 (95% CI 0.03 - 1.99), 0.225  |
| DRB1*13 n (%) | 23 (8.85)                 | 33 (10.86)                 | 0.8 (95% CI 0.46 - 1.4), 0.426    |
| DRB1*14 n (%) | 12 (4.62)                 | 16 (5.26)                  | 0.87 (95% CI 0.4 - 1.88), 0.724   |
| DRB1*15 n (%) | 17 (6.54)                 | 37 (12.17)                 | 0.5 (95% CI 0.28 - 0.92), 0.023   |
| DRB1*16 n (%) | 22 (8.46)                 | 23 (7.57)                  | 1.13 (95% CI 0.61 - 2.08), 0.696  |

n for groups, number of alleles; HLA, human leukocyte antigen; OR, odds ratio; CI, confidence interval; NC, cannot be computed.

**Supplementary Table S5.** Univariate logistic regression analysis predicting the odds of severe disease based on HLA-DQB1 alleles

| <b>Group:</b> | <b>Severe<br/>(n=260)</b> | <b>Control<br/>(n=304)</b> | <b>OR (95% CI), P-value</b>       |
|---------------|---------------------------|----------------------------|-----------------------------------|
| DQB1*02 n (%) | 68 (26.15)                | 71 (23.36)                 | 1.16 (95% CI 0.79 - 1.71), 0.442  |
| DQB1*03 n (%) | 84 (32.31)                | 96 (31.58)                 | 1.03 (95% CI 0.73 - 1.47), 0.853  |
| DQB1*04 n (%) | 5 (1.92)                  | 2 (0.66)                   | 2.96 (95% CI 0.57 - 15.39), 0.257 |
| DQB1*05 n (%) | 70 (26.92)                | 72 (23.68)                 | 1.19 (95% CI 0.81 - 1.74), 0.377  |
| DQB1*06 n (%) | 33 (12.69)                | 63 (20.72)                 | 0.56 (95% CI 0.35 - 0.88), 0.011  |

n for groups, number of alleles; HLA, human leukocyte antigen; OR, odds ratio; CI, confidence interval; NC, cannot be computed.

## Within severe group

Comparison concerning deceased status

**Supplementary Table S6.** Univariate logistic regression analysis predicting the odds of death based on HLA-A alleles

| <b>Deceased:</b> | <b>Yes<br/>(n=88)</b> | <b>No<br/>(n=172)</b> | <b>OR (95% CI), P-value</b>       |
|------------------|-----------------------|-----------------------|-----------------------------------|
| A*01 n (%)       | 14 (15.91)            | 27 (15.7)             | 1.02 (95% CI 0.5 - 2.05), 0.965   |
| A*02 n (%)       | 26 (29.55)            | 51 (29.65)            | 0.99 (95% CI 0.57 - 1.75), 0.986  |
| A*03 n (%)       | 8 (9.09)              | 19 (11.05)            | 0.81 (95% CI 0.34 - 1.92), 0.625  |
| A*11 n (%)       | 5 (5.68)              | 12 (6.98)             | 0.8 (95% CI 0.27 - 2.36), 0.689   |
| A*23 n (%)       | 0 (0)                 | 3 (1.74)              | 0 (95% CI 0 - NC), 0.553          |
| A*24 n (%)       | 16 (18.18)            | 19 (11.05)            | 1.79 (95% CI 0.87 - 3.68), 0.111  |
| A*25 n (%)       | 2 (2.27)              | 2 (1.16)              | 1.98 (95% CI 0.27 - 14.27), 0.606 |
| A*26 n (%)       | 3 (3.41)              | 11 (6.4)              | 0.52 (95% CI 0.14 - 1.9), 0.394   |
| A*29 n (%)       | 0 (0)                 | 1 (0.58)              | 0 (95% CI 0 - NC), 1              |
| A*30 n (%)       | 7 (7.95)              | 3 (1.74)              | 4.87 (95% CI 1.23 - 19.32), 0.034 |
| A*31 n (%)       | 1 (1.14)              | 6 (3.49)              | 0.32 (95% CI 0.04 - 2.68), 0.429  |
| A*32 n (%)       | 2 (2.27)              | 11 (6.4)              | 0.34 (95% CI 0.07 - 1.57), 0.229  |
| A*33 n (%)       | 1 (1.14)              | 0 (0)                 | Inf (95% CI NC - Inf), 0.338      |
| A*66 n (%)       | 0 (0)                 | 1 (0.58)              | 0 (95% CI 0 - NC), 1              |
| A*68 n (%)       | 2 (2.27)              | 3 (1.74)              | 1.31 (95% CI 0.21 - 7.99), 1      |
| A*69 n (%)       | 1 (1.14)              | 2 (1.16)              | 0.98 (95% CI 0.09 - 10.93), 1     |
| A*74 n (%)       | 0 (0)                 | 1 (0.58)              | 0 (95% CI 0 - NC), 1              |

n for groups, number of alleles; HLA, human leukocyte antigen; OR, odds ratio; CI, confidence interval; NC, cannot be computed.

**Supplementary Table S7.** Univariate logistic regression analysis predicting the odds of death based on HLA-B alleles

| <b>Deceased:</b> | <b>Yes<br/>(n=88)</b> | <b>No<br/>(n=172)</b> | <b>OR (95% CI), P-value</b>       |
|------------------|-----------------------|-----------------------|-----------------------------------|
| B*07 n (%)       | 4 (4.55)              | 14 (8.14)             | 0.54 (95% CI 0.17 - 1.68), 0.28   |
| B*08 n (%)       | 13 (14.77)            | 13 (7.56)             | 2.12 (95% CI 0.94 - 4.8), 0.067   |
| B*13 n (%)       | 2 (2.27)              | 6 (3.49)              | 0.64 (95% CI 0.13 - 3.26), 0.721  |
| B*14 n (%)       | 3 (3.41)              | 1 (0.58)              | 6.04 (95% CI 0.62 - 58.89), 0.114 |
| B*15 n (%)       | 4 (4.55)              | 9 (5.23)              | 0.86 (95% CI 0.26 - 2.88), 1      |
| B*18 n (%)       | 16 (18.18)            | 12 (6.98)             | 2.96 (95% CI 1.33 - 6.58), 0.006  |
| B*27 n (%)       | 7 (7.95)              | 15 (8.72)             | 0.9 (95% CI 0.35 - 2.31), 0.834   |
| B*35 n (%)       | 9 (10.23)             | 21 (12.21)            | 0.82 (95% CI 0.36 - 1.87), 0.636  |

|            |          |           |                                   |
|------------|----------|-----------|-----------------------------------|
| B*37 n (%) | 0 (0)    | 1 (0.58)  | 0 (95% CI 0 - NC), 1              |
| B*38 n (%) | 3 (3.41) | 9 (5.23)  | 0.64 (95% CI 0.17 - 2.42), 0.756  |
| B*39 n (%) | 3 (3.41) | 3 (1.74)  | 1.99 (95% CI 0.39 - 10.06), 0.41  |
| B*40 n (%) | 3 (3.41) | 7 (4.07)  | 0.83 (95% CI 0.21 - 3.3), 1       |
| B*41 n (%) | 0 (0)    | 1 (0.58)  | 0 (95% CI 0 - NC), 1              |
| B*44 n (%) | 6 (6.82) | 16 (9.3)  | 0.71 (95% CI 0.27 - 1.89), 0.496  |
| B*47 n (%) | 0 (0)    | 1 (0.58)  | 0 (95% CI 0 - NC), 1              |
| B*49 n (%) | 2 (2.27) | 2 (1.16)  | 1.98 (95% CI 0.27 - 14.27), 0.606 |
| B*50 n (%) | 2 (2.27) | 8 (4.65)  | 0.48 (95% CI 0.1 - 2.29), 0.502   |
| B*51 n (%) | 4 (4.55) | 13 (7.56) | 0.58 (95% CI 0.18 - 1.84), 0.352  |
| B*52 n (%) | 3 (3.41) | 9 (5.23)  | 0.64 (95% CI 0.17 - 2.42), 0.756  |
| B*53 n (%) | 0 (0)    | 1 (0.58)  | 0 (95% CI 0 - NC), 1              |
| B*55 n (%) | 1 (1.14) | 4 (2.33)  | 0.48 (95% CI 0.05 - 4.39), 0.665  |
| B*56 n (%) | 1 (1.14) | 1 (0.58)  | 1.97 (95% CI 0.12 - 31.8), 1      |
| B*57 n (%) | 2 (2.27) | 5 (2.91)  | 0.78 (95% CI 0.15 - 4.09), 1      |
| B*58 n (%) | 0 (0)    | 0 (0)     | NC (95% CI NC - NC), 1            |

n for groups, number of alleles; HLA, human leukocyte antigen; OR, odds ratio; CI, confidence interval; NC, cannot be computed.

**Supplementary Table S8.** Univariate logistic regression analysis predicting the odds of death based on HLA-C alleles

| <b>Deceased:</b> | <b>Yes<br/>(n=88)</b> | <b>No<br/>(n=172)</b> | <b>OR (95% CI), P-value</b>       |
|------------------|-----------------------|-----------------------|-----------------------------------|
| C*01 n (%)       | 5 (5.68)              | 7 (4.07)              | 1.42 (95% CI 0.44 - 4.61), 0.547  |
| C*02 n (%)       | 7 (7.95)              | 14 (8.14)             | 0.98 (95% CI 0.38 - 2.51), 0.959  |
| C*03 n (%)       | 6 (6.82)              | 14 (8.14)             | 0.83 (95% CI 0.31 - 2.23), 0.705  |
| C*04 n (%)       | 10 (11.36)            | 32 (18.6)             | 0.56 (95% CI 0.26 - 1.2), 0.133   |
| C*05 n (%)       | 2 (2.27)              | 4 (2.33)              | 0.98 (95% CI 0.18 - 5.44), 1      |
| C*06 n (%)       | 6 (6.82)              | 18 (10.47)            | 0.63 (95% CI 0.24 - 1.64), 0.336  |
| C*07 n (%)       | 33 (37.5)             | 39 (22.67)            | 2.05 (95% CI 1.17 - 3.58), 0.011  |
| C*08 n (%)       | 3 (3.41)              | 1 (0.58)              | 6.04 (95% CI 0.62 - 58.89), 0.114 |
| C*12 n (%)       | 11 (12.5)             | 28 (16.28)            | 0.73 (95% CI 0.35 - 1.56), 0.419  |
| C*14 n (%)       | 0 (0)                 | 3 (1.74)              | 0 (95% CI 0 - NC), 0.553          |
| C*15 n (%)       | 2 (2.27)              | 6 (3.49)              | 0.64 (95% CI 0.13 - 3.26), 0.721  |
| C*16 n (%)       | 3 (3.41)              | 6 (3.49)              | 0.98 (95% CI 0.24 - 4), 1         |
| C*17 n (%)       | 0 (0)                 | 0 (0)                 | NC (95% CI NC - NC), 1            |

n for groups, number of alleles; HLA, human leukocyte antigen; OR, odds ratio; CI, confidence interval; NC, cannot be computed.

**Supplementary Table S9.** Univariate logistic regression analysis predicting the odds of death based on HLA-DRB1 alleles

| <b>Deceased:</b> | <b>Yes<br/>(n=88)</b> | <b>No<br/>(n=172)</b> | <b>OR (95% CI), P-value</b>      |
|------------------|-----------------------|-----------------------|----------------------------------|
| DRB1*01 n (%)    | 6 (6.82)              | 22 (12.79)            | 0.5 (95% CI 0.19 - 1.28), 0.142  |
| DRB1*03 n (%)    | 16 (18.18)            | 24 (13.95)            | 1.37 (95% CI 0.69 - 2.74), 0.371 |
| DRB1*04 n (%)    | 3 (3.41)              | 16 (9.3)              | 0.34 (95% CI 0.1 - 1.21), 0.084  |
| DRB1*07 n (%)    | 8 (9.09)              | 25 (14.53)            | 0.59 (95% CI 0.25 - 1.36), 0.212 |
| DRB1*08 n (%)    | 2 (2.27)              | 4 (2.33)              | 0.98 (95% CI 0.18 - 5.44), 1     |
| DRB1*09 n (%)    | 0 (0)                 | 1 (0.58)              | 0 (95% CI 0 - NC), 1             |
| DRB1*10 n (%)    | 1 (1.14)              | 2 (1.16)              | 0.98 (95% CI 0.09 - 10.93), 1    |
| DRB1*11 n (%)    | 25 (28.41)            | 30 (17.44)            | 1.88 (95% CI 1.02 - 3.45), 0.04  |
| DRB1*12 n (%)    | 0 (0)                 | 1 (0.58)              | 0 (95% CI 0 - NC), 1             |
| DRB1*13 n (%)    | 10 (11.36)            | 13 (7.56)             | 1.57 (95% CI 0.66 - 3.73), 0.307 |
| DRB1*14 n (%)    | 4 (4.55)              | 8 (4.65)              | 0.98 (95% CI 0.29 - 3.34), 1     |
| DRB1*15 n (%)    | 4 (4.55)              | 13 (7.56)             | 0.58 (95% CI 0.18 - 1.84), 0.352 |
| DRB1*16 n (%)    | 9 (10.23)             | 13 (7.56)             | 1.39 (95% CI 0.57 - 3.4), 0.464  |

n for groups, number of alleles; HLA, human leukocyte antigen; OR, odds ratio; CI, confidence interval; NC, cannot be computed.

**Supplementary Table S10.** Univariate logistic regression analysis predicting the odds of death based on HLA-DQB1 alleles

| <b>Deceased:</b> | <b>Yes<br/>(n=88)</b> | <b>No<br/>(n=172)</b> | <b>OR (95% CI), P-value</b>      |
|------------------|-----------------------|-----------------------|----------------------------------|
| DQB1*02 n (%)    | 22 (25)               | 46 (26.74)            | 0.91 (95% CI 0.51 - 1.65), 0.762 |
| DQB1*03 n (%)    | 31 (35.23)            | 53 (30.81)            | 1.22 (95% CI 0.71 - 2.1), 0.471  |
| DQB1*04 n (%)    | 2 (2.27)              | 3 (1.74)              | 1.31 (95% CI 0.21 - 7.99), 1     |
| DQB1*05 n (%)    | 22 (25)               | 48 (27.91)            | 0.86 (95% CI 0.48 - 1.55), 0.617 |
| DQB1*06 n (%)    | 11 (12.5)             | 22 (12.79)            | 0.97 (95% CI 0.45 - 2.11), 0.947 |

n for groups, number of alleles; HLA, human leukocyte antigen; OR, odds ratio; CI, confidence interval; NC, cannot be computed.

Comparison concerning diseased or ICU status

**Supplementary Table S11.** Univariate logistic regression analysis predicting the odds of death or ICU stay based on HLA-A alleles

| <b>Deceased/ICU:</b> | <b>Yes<br/>(n=146)</b> | <b>No<br/>(n=114)</b> | <b>OR (95% CI), P-value</b>      |
|----------------------|------------------------|-----------------------|----------------------------------|
| A*01 n (%)           | 26 (17.81)             | 15 (13.16)            | 1.43 (95% CI 0.72 - 2.85), 0.307 |

|            |            |            |                                  |
|------------|------------|------------|----------------------------------|
| A*02 n (%) | 46 (31.51) | 31 (27.19) | 1.23 (95% CI 0.72 - 2.11), 0.45  |
| A*03 n (%) | 10 (6.85)  | 17 (14.91) | 0.42 (95% CI 0.18 - 0.96), 0.034 |
| A*11 n (%) | 11 (7.53)  | 6 (5.26)   | 1.47 (95% CI 0.53 - 4.09), 0.462 |
| A*23 n (%) | 0 (0)      | 3 (2.63)   | 0 (95% CI 0 - NC), 0.083         |
| A*24 n (%) | 21 (14.38) | 14 (12.28) | 1.2 (95% CI 0.58 - 2.48), 0.622  |
| A*25 n (%) | 2 (1.37)   | 2 (1.75)   | 0.78 (95% CI 0.11 - 5.61), 1     |
| A*26 n (%) | 7 (4.79)   | 7 (6.14)   | 0.77 (95% CI 0.26 - 2.26), 0.633 |
| A*29 n (%) | 1 (0.68)   | 0 (0)      | Inf (95% CI NC - Inf), 1         |
| A*30 n (%) | 7 (4.79)   | 3 (2.63)   | 1.86 (95% CI 0.47 - 7.37), 0.52  |
| A*31 n (%) | 2 (1.37)   | 5 (4.39)   | 0.3 (95% CI 0.06 - 1.59), 0.246  |
| A*32 n (%) | 5 (3.42)   | 8 (7.02)   | 0.47 (95% CI 0.15 - 1.48), 0.187 |
| A*33 n (%) | 1 (0.68)   | 0 (0)      | Inf (95% CI NC - Inf), 1         |
| A*66 n (%) | 0 (0)      | 1 (0.88)   | 0 (95% CI 0 - NC), 0.438         |
| A*68 n (%) | 3 (2.05)   | 2 (1.75)   | 1.17 (95% CI 0.19 - 7.15), 1     |
| A*69 n (%) | 3 (2.05)   | 0 (0)      | Inf (95% CI NC - Inf), 0.259     |
| A*74 n (%) | 1 (0.68)   | 0 (0)      | Inf (95% CI NC - Inf), 1         |

n for groups, number of alleles; HLA, human leukocyte antigen; ICU, intensive care unit; OR, odds ratio; CI, confidence interval; NC, cannot be computed.

**Supplementary Table S12.** Univariate logistic regression analysis predicting the odds of death or ICU stay based on HLA-B alleles

| Deceased/ICU: | Yes<br>(n=146) | No<br>(n=114) | OR (95% CI), P-value             |
|---------------|----------------|---------------|----------------------------------|
| B*07 n (%)    | 8 (5.48)       | 10 (8.77)     | 0.6 (95% CI 0.23 - 1.58), 0.299  |
| B*08 n (%)    | 17 (11.64)     | 9 (7.89)      | 1.54 (95% CI 0.66 - 3.59), 0.317 |
| B*13 n (%)    | 3 (2.05)       | 5 (4.39)      | 0.46 (95% CI 0.11 - 1.96), 0.304 |
| B*14 n (%)    | 4 (2.74)       | 0 (0)         | Inf (95% CI NC - Inf), 0.133     |
| B*15 n (%)    | 9 (6.16)       | 4 (3.51)      | 1.81 (95% CI 0.54 - 6.02), 0.33  |
| B*18 n (%)    | 20 (13.7)      | 8 (7.02)      | 2.1 (95% CI 0.89 - 4.97), 0.085  |
| B*27 n (%)    | 11 (7.53)      | 11 (9.65)     | 0.76 (95% CI 0.32 - 1.83), 0.543 |
| B*35 n (%)    | 13 (8.9)       | 17 (14.91)    | 0.56 (95% CI 0.26 - 1.2), 0.132  |
| B*37 n (%)    | 0 (0)          | 1 (0.88)      | 0 (95% CI 0 - NC), 0.438         |
| B*38 n (%)    | 6 (4.11)       | 6 (5.26)      | 0.77 (95% CI 0.24 - 2.46), 0.66  |
| B*39 n (%)    | 3 (2.05)       | 3 (2.63)      | 0.78 (95% CI 0.15 - 3.92), 1     |
| B*40 n (%)    | 7 (4.79)       | 3 (2.63)      | 1.86 (95% CI 0.47 - 7.37), 0.52  |
| B*41 n (%)    | 1 (0.68)       | 0 (0)         | Inf (95% CI NC - Inf), 1         |
| B*44 n (%)    | 10 (6.85)      | 12 (10.53)    | 0.62 (95% CI 0.26 - 1.5), 0.29   |
| B*47 n (%)    | 1 (0.68)       | 0 (0)         | Inf (95% CI NC - Inf), 1         |
| B*49 n (%)    | 2 (1.37)       | 2 (1.75)      | 0.78 (95% CI 0.11 - 5.61), 1     |
| B*50 n (%)    | 3 (2.05)       | 7 (6.14)      | 0.32 (95% CI 0.08 - 1.27), 0.11  |

|            |          |          |                                   |
|------------|----------|----------|-----------------------------------|
| B*51 n (%) | 9 (6.16) | 8 (7.02) | 0.87 (95% CI 0.32 - 2.33), 0.782  |
| B*52 n (%) | 9 (6.16) | 3 (2.63) | 2.43 (95% CI 0.64 - 9.19), 0.178  |
| B*53 n (%) | 0 (0)    | 1 (0.88) | 0 (95% CI 0 - NC), 0.438          |
| B*55 n (%) | 4 (2.74) | 1 (0.88) | 3.18 (95% CI 0.35 - 28.88), 0.389 |
| B*56 n (%) | 1 (0.68) | 1 (0.88) | 0.78 (95% CI 0.05 - 12.6), 1      |
| B*57 n (%) | 5 (3.42) | 2 (1.75) | 1.99 (95% CI 0.38 - 10.43), 0.472 |
| B*58 n (%) | 0 (0)    | 0 (0)    | NC (95% CI NC - NC), 1            |

n for groups, number of alleles; HLA, human leukocyte antigen; ICU, intensive care unit; OR, odds ratio; CI, confidence interval; NC, cannot be computed.

**Supplementary Table S13.** Univariate logistic regression analysis predicting the odds of death or ICU stay based on HLA-C alleles

| Deceased/ICU: | Yes<br>(n=146) | No<br>(n=114) | OR (95% CI), P-value             |
|---------------|----------------|---------------|----------------------------------|
| C*01 n (%)    | 7 (4.79)       | 5 (4.39)      | 1.1 (95% CI 0.34 - 3.55), 0.876  |
| C*02 n (%)    | 10 (6.85)      | 11 (9.65)     | 0.69 (95% CI 0.28 - 1.68), 0.411 |
| C*03 n (%)    | 14 (9.59)      | 6 (5.26)      | 1.91 (95% CI 0.71 - 5.14), 0.194 |
| C*04 n (%)    | 16 (10.96)     | 26 (22.81)    | 0.42 (95% CI 0.21 - 0.82), 0.01  |
| C*05 n (%)    | 3 (2.05)       | 3 (2.63)      | 0.78 (95% CI 0.15 - 3.92), 1     |
| C*06 n (%)    | 11 (7.53)      | 13 (11.4)     | 0.63 (95% CI 0.27 - 1.47), 0.285 |
| C*07 n (%)    | 46 (31.51)     | 26 (22.81)    | 1.56 (95% CI 0.89 - 2.72), 0.12  |
| C*08 n (%)    | 4 (2.74)       | 0 (0)         | Inf (95% CI NC - Inf), 0.133     |
| C*12 n (%)    | 23 (15.75)     | 16 (14.04)    | 1.15 (95% CI 0.57 - 2.29), 0.7   |
| C*14 n (%)    | 2 (1.37)       | 1 (0.88)      | 1.57 (95% CI 0.14 - 17.53), 1    |
| C*15 n (%)    | 4 (2.74)       | 4 (3.51)      | 0.77 (95% CI 0.19 - 3.17), 0.733 |
| C*16 n (%)    | 6 (4.11)       | 3 (2.63)      | 1.59 (95% CI 0.39 - 6.48), 0.735 |
| C*17 n (%)    | 0 (0)          | 0 (0)         | NC (95% CI NC - NC), 1           |

n for groups, number of alleles; HLA, human leukocyte antigen; ICU, intensive care unit; OR, odds ratio; CI, confidence interval; NC, cannot be computed.

**Supplementary Table S14.** Univariate logistic regression analysis predicting the odds of death or ICU stay based on HLA-DRB1 alleles

| Deceased/ICU: | Yes<br>(n=146) | No<br>(n=114) | OR (95% CI), P-value             |
|---------------|----------------|---------------|----------------------------------|
| DRB1*01 n (%) | 15 (10.27)     | 13 (11.4)     | 0.89 (95% CI 0.41 - 1.95), 0.771 |
| DRB1*03 n (%) | 23 (15.75)     | 17 (14.91)    | 1.07 (95% CI 0.54 - 2.11), 0.852 |
| DRB1*04 n (%) | 7 (4.79)       | 12 (10.53)    | 0.43 (95% CI 0.16 - 1.13), 0.078 |
| DRB1*07 n (%) | 14 (9.59)      | 19 (16.67)    | 0.53 (95% CI 0.25 - 1.11), 0.089 |
| DRB1*08 n (%) | 4 (2.74)       | 2 (1.75)      | 1.58 (95% CI 0.28 - 8.77), 0.698 |
| DRB1*09 n (%) | 0 (0)          | 1 (0.88)      | 0 (95% CI 0 - NC), 0.438         |



|               |            |            |                                  |
|---------------|------------|------------|----------------------------------|
| DRB1*10 n (%) | 1 (0.68)   | 2 (1.75)   | 0.39 (95% CI 0.03 - 4.31), 0.583 |
| DRB1*11 n (%) | 32 (21.92) | 23 (20.18) | 1.11 (95% CI 0.61 - 2.03), 0.733 |
| DRB1*12 n (%) | 1 (0.68)   | 0 (0)      | Inf (95% CI NC - Inf), 1         |
| DRB1*13 n (%) | 17 (11.64) | 6 (5.26)   | 2.37 (95% CI 0.9 - 6.23), 0.072  |
| DRB1*14 n (%) | 8 (5.48)   | 4 (3.51)   | 1.59 (95% CI 0.47 - 5.43), 0.452 |
| DRB1*15 n (%) | 12 (8.22)  | 5 (4.39)   | 1.95 (95% CI 0.67 - 5.71), 0.215 |
| DRB1*16 n (%) | 12 (8.22)  | 10 (8.77)  | 0.93 (95% CI 0.39 - 2.24), 0.874 |

n for groups, number of alleles; HLA, human leukocyte antigen; ICU, intensive care unit; OR, odds ratio; CI, confidence interval; NC, cannot be computed.

**Supplementary Table S15.** Univariate logistic regression analysis predicting the odds of death or ICU stay based on HLA-DQB1 alleles

| <b>Deceased/ICU:</b> | <b>Yes<br/>(n=146)</b> | <b>No<br/>(n=114)</b> | <b>OR (95% CI), P-value</b>       |
|----------------------|------------------------|-----------------------|-----------------------------------|
| DQB1*02 n (%)        | 35 (23.97)             | 33 (28.95)            | 0.77 (95% CI 0.44 - 1.35), 0.365  |
| DQB1*03 n (%)        | 43 (29.45)             | 41 (35.96)            | 0.74 (95% CI 0.44 - 1.25), 0.265  |
| DQB1*04 n (%)        | 4 (2.74)               | 1 (0.88)              | 3.18 (95% CI 0.35 - 28.88), 0.389 |
| DQB1*05 n (%)        | 40 (27.4)              | 30 (26.32)            | 1.06 (95% CI 0.61 - 1.84), 0.845  |
| DQB1*06 n (%)        | 24 (16.44)             | 9 (7.89)              | 2.3 (95% CI 1.02 - 5.16), 0.04    |

n for groups, number of alleles; HLA, human leukocyte antigen; ICU, intensive care unit; OR, odds ratio; CI, confidence interval; NC, cannot be computed.

Comparisons concerning oxygen therapy

**Supplementary Table S16.** Univariate logistic regression analysis predicting the odds of oxygen therapy based on HLA-A alleles

| <b>With oxygen:</b> | <b>Yes<br/>(n=144)</b> | <b>No<br/>(n=92)</b> | <b>OR (95% CI), P-value</b>      |
|---------------------|------------------------|----------------------|----------------------------------|
| A*01 n (%)          | 26 (18.06)             | 12 (13.04)           | 1.47 (95% CI 0.7 - 3.08), 0.307  |
| A*02 n (%)          | 47 (32.64)             | 26 (28.26)           | 1.23 (95% CI 0.69 - 2.18), 0.478 |
| A*03 n (%)          | 11 (7.64)              | 15 (16.3)            | 0.42 (95% CI 0.19 - 0.97), 0.038 |
| A*11 n (%)          | 7 (4.86)               | 8 (8.7)              | 0.54 (95% CI 0.19 - 1.53), 0.239 |
| A*23 n (%)          | 2 (1.39)               | 1 (1.09)             | 1.28 (95% CI 0.11 - 14.34), 1    |
| A*24 n (%)          | 20 (13.89)             | 8 (8.7)              | 1.69 (95% CI 0.71 - 4.02), 0.229 |
| A*25 n (%)          | 2 (1.39)               | 2 (2.17)             | 0.63 (95% CI 0.09 - 4.58), 0.644 |
| A*26 n (%)          | 11 (7.64)              | 3 (3.26)             | 2.45 (95% CI 0.67 - 9.04), 0.165 |
| A*29 n (%)          | 1 (0.69)               | 0 (0)                | Inf (95% CI NC - Inf), 1         |
| A*30 n (%)          | 2 (1.39)               | 3 (3.26)             | 0.42 (95% CI 0.07 - 2.55), 0.381 |
| A*31 n (%)          | 3 (2.08)               | 3 (3.26)             | 0.63 (95% CI 0.12 - 3.2), 0.68   |

|            |          |          |                                  |
|------------|----------|----------|----------------------------------|
| A*32 n (%) | 6 (4.17) | 7 (7.61) | 0.53 (95% CI 0.17 - 1.62), 0.258 |
| A*33 n (%) | 1 (0.69) | 0 (0)    | Inf (95% CI NC - Inf), 1         |
| A*66 n (%) | 0 (0)    | 1 (1.09) | 0 (95% CI 0 - NC), 0.39          |
| A*68 n (%) | 2 (1.39) | 3 (3.26) | 0.42 (95% CI 0.07 - 2.55), 0.381 |
| A*69 n (%) | 2 (1.39) | 0 (0)    | Inf (95% CI NC - Inf), 0.522     |

n for groups, number of alleles; HLA, human leukocyte antigen; OR, odds ratio; CI, confidence interval; NC, cannot be computed.

**Supplementary Table S17.** Univariate logistic regression analysis predicting the odds of oxygen therapy based on HLA-B alleles

| <b>With oxygen:</b> | <b>Yes<br/>(n=144)</b> | <b>No<br/>(n=92)</b> | <b>OR (95% CI), P-value</b>      |
|---------------------|------------------------|----------------------|----------------------------------|
| B*07 n (%)          | 10 (6.94)              | 7 (7.61)             | 0.91 (95% CI 0.33 - 2.47), 0.847 |
| B*08 n (%)          | 11 (7.64)              | 11 (11.96)           | 0.61 (95% CI 0.25 - 1.47), 0.266 |
| B*13 n (%)          | 2 (1.39)               | 5 (5.43)             | 0.25 (95% CI 0.05 - 1.29), 0.113 |
| B*14 n (%)          | 2 (1.39)               | 0 (0)                | Inf (95% CI NC - Inf), 0.522     |
| B*15 n (%)          | 8 (5.56)               | 4 (4.35)             | 1.29 (95% CI 0.38 - 4.43), 0.77  |
| B*18 n (%)          | 15 (10.42)             | 8 (8.7)              | 1.22 (95% CI 0.5 - 3.01), 0.664  |
| B*27 n (%)          | 13 (9.03)              | 9 (9.78)             | 0.92 (95% CI 0.37 - 2.24), 0.846 |
| B*35 n (%)          | 16 (11.11)             | 11 (11.96)           | 0.92 (95% CI 0.41 - 2.08), 0.842 |
| B*37 n (%)          | 0 (0)                  | 1 (1.09)             | 0 (95% CI 0 - NC), 0.39          |
| B*38 n (%)          | 9 (6.25)               | 3 (3.26)             | 1.98 (95% CI 0.52 - 7.51), 0.376 |
| B*39 n (%)          | 3 (2.08)               | 2 (2.17)             | 0.96 (95% CI 0.16 - 5.84), 1     |
| B*40 n (%)          | 7 (4.86)               | 2 (2.17)             | 2.3 (95% CI 0.47 - 11.32), 0.488 |
| B*41 n (%)          | 1 (0.69)               | 0 (0)                | Inf (95% CI NC - Inf), 1         |
| B*44 n (%)          | 11 (7.64)              | 9 (9.78)             | 0.76 (95% CI 0.3 - 1.92), 0.564  |
| B*47 n (%)          | 1 (0.69)               | 0 (0)                | Inf (95% CI NC - Inf), 1         |
| B*49 n (%)          | 2 (1.39)               | 2 (2.17)             | 0.63 (95% CI 0.09 - 4.58), 0.644 |
| B*50 n (%)          | 5 (3.47)               | 5 (5.43)             | 0.63 (95% CI 0.18 - 2.22), 0.518 |
| B*51 n (%)          | 10 (6.94)              | 5 (5.43)             | 1.3 (95% CI 0.43 - 3.93), 0.643  |
| B*52 n (%)          | 8 (5.56)               | 4 (4.35)             | 1.29 (95% CI 0.38 - 4.43), 0.77  |
| B*53 n (%)          | 1 (0.69)               | 0 (0)                | Inf (95% CI NC - Inf), 1         |
| B*55 n (%)          | 3 (2.08)               | 1 (1.09)             | 1.94 (95% CI 0.2 - 18.9), 1      |
| B*56 n (%)          | 1 (0.69)               | 1 (1.09)             | 0.64 (95% CI 0.04 - 10.3), 1     |
| B*57 n (%)          | 5 (3.47)               | 2 (2.17)             | 1.62 (95% CI 0.31 - 8.52), 0.708 |
| B*58 n (%)          | 0 (0)                  | 0 (0)                | NC (95% CI NC - NC), 1           |

n for groups, number of alleles; HLA, human leukocyte antigen; OR, odds ratio; CI, confidence interval; NC, cannot be computed.

**Supplementary Table S18.** Univariate logistic regression analysis predicting the odds of oxygen therapy based on HLA-C alleles

| <b>With oxygen:</b> | <b>Yes<br/>(n=144)</b> | <b>No<br/>(n=92)</b> | <b>OR (95% CI), P-value</b>       |
|---------------------|------------------------|----------------------|-----------------------------------|
| C*01 n (%)          | 8 (5.56)               | 4 (4.35)             | 1.29 (95% CI 0.38 - 4.43), 0.77   |
| C*02 n (%)          | 11 (7.64)              | 10 (10.87)           | 0.68 (95% CI 0.28 - 1.67), 0.395  |
| C*03 n (%)          | 11 (7.64)              | 7 (7.61)             | 1 (95% CI 0.37 - 2.69), 0.993     |
| C*04 n (%)          | 21 (14.58)             | 17 (18.48)           | 0.75 (95% CI 0.37 - 1.52), 0.427  |
| C*05 n (%)          | 2 (1.39)               | 3 (3.26)             | 0.42 (95% CI 0.07 - 2.55), 0.381  |
| C*06 n (%)          | 11 (7.64)              | 12 (13.04)           | 0.55 (95% CI 0.23 - 1.31), 0.172  |
| C*07 n (%)          | 39 (27.08)             | 23 (25)              | 1.11 (95% CI 0.61 - 2.03), 0.723  |
| C*08 n (%)          | 2 (1.39)               | 0 (0)                | Inf (95% CI NC - Inf), 0.522      |
| C*12 n (%)          | 26 (18.06)             | 13 (14.13)           | 1.34 (95% CI 0.65 - 2.76), 0.428  |
| C*14 n (%)          | 3 (2.08)               | 0 (0)                | Inf (95% CI NC - Inf), 0.283      |
| C*15 n (%)          | 5 (3.47)               | 1 (1.09)             | 3.27 (95% CI 0.38 - 28.48), 0.409 |
| C*16 n (%)          | 5 (3.47)               | 2 (2.17)             | 1.62 (95% CI 0.31 - 8.52), 0.708  |
| C*17 n (%)          | 0 (0)                  | 0 (0)                | NC (95% CI NC - NC), 1            |

n for groups, number of alleles; HLA, human leukocyte antigen; OR, odds ratio; CI, confidence interval; NC, cannot be computed.

**Supplementary Table S19.** Univariate logistic regression analysis predicting the odds of oxygen therapy based on HLA-DRB1 alleles

| <b>With oxygen:</b> | <b>Yes<br/>(n=144)</b> | <b>No<br/>(n=92)</b> | <b>OR (95% CI), P-value</b>      |
|---------------------|------------------------|----------------------|----------------------------------|
| DRB1*01 n (%)       | 17 (11.81)             | 9 (9.78)             | 1.23 (95% CI 0.53 - 2.9), 0.628  |
| DRB1*03 n (%)       | 17 (11.81)             | 18 (19.57)           | 0.55 (95% CI 0.27 - 1.13), 0.102 |
| DRB1*04 n (%)       | 11 (7.64)              | 7 (7.61)             | 1 (95% CI 0.37 - 2.69), 0.993    |
| DRB1*07 n (%)       | 14 (9.72)              | 15 (16.3)            | 0.55 (95% CI 0.25 - 1.21), 0.133 |
| DRB1*08 n (%)       | 6 (4.17)               | 0 (0)                | Inf (95% CI NC - Inf), 0.084     |
| DRB1*09 n (%)       | 0 (0)                  | 1 (1.09)             | 0 (95% CI 0 - NC), 0.39          |
| DRB1*10 n (%)       | 2 (1.39)               | 1 (1.09)             | 1.28 (95% CI 0.11 - 14.34), 1    |
| DRB1*11 n (%)       | 30 (20.83)             | 18 (19.57)           | 1.08 (95% CI 0.56 - 2.08), 0.813 |
| DRB1*12 n (%)       | 1 (0.69)               | 0 (0)                | Inf (95% CI NC - Inf), 1         |
| DRB1*13 n (%)       | 16 (11.11)             | 5 (5.43)             | 2.17 (95% CI 0.77 - 6.16), 0.135 |
| DRB1*14 n (%)       | 8 (5.56)               | 3 (3.26)             | 1.75 (95% CI 0.45 - 6.76), 0.535 |
| DRB1*15 n (%)       | 12 (8.33)              | 4 (4.35)             | 2 (95% CI 0.62 - 6.4), 0.235     |
| DRB1*16 n (%)       | 10 (6.94)              | 11 (11.96)           | 0.55 (95% CI 0.22 - 1.35), 0.187 |

n for groups, number of allele; HLA, human leukocyte antigen; OR, odds ratio; CI, confidence interval; NC, cannot be computed.

**Supplementary Table S20.** Univariate logistic regression analysis predicting the odds of oxygen therapy based on HLA-DQB1 alleles

| <b>With oxygen:</b> | <b>Yes<br/>(n=144)</b> | <b>No<br/>(n=92)</b> | <b>OR (95% CI), P-value</b>      |
|---------------------|------------------------|----------------------|----------------------------------|
| DQB1*02 n (%)       | 28 (19.44)             | 31 (33.7)            | 0.47 (95% CI 0.26 - 0.86), 0.014 |
| DQB1*03 n (%)       | 48 (33.33)             | 28 (30.43)           | 1.14 (95% CI 0.65 - 2.01), 0.642 |
| DQB1*04 n (%)       | 5 (3.47)               | 0 (0)                | Inf (95% CI NC - Inf), 0.16      |
| DQB1*05 n (%)       | 40 (27.78)             | 25 (27.17)           | 1.03 (95% CI 0.57 - 1.85), 0.919 |
| DQB1*06 n (%)       | 23 (15.97)             | 8 (8.7)              | 2 (95% CI 0.85 - 4.68), 0.107    |

n for groups, number of alleles; HLA, human leukocyte antigen; OR, odds ratio; CI, confidence interval; NC, cannot be computed.

Multiple logistic regressions

**Supplementary Table S21.** Multiple logistic regressions predicting deceased within the severe group, based on HLA allele A\*30, adjusted for age, sex, number of comorbidities, and vaccination.

|                         | <b>OR adjusted</b> | <b>(95% CI)</b> | <b>p</b> |
|-------------------------|--------------------|-----------------|----------|
| Age (years)             | 1.05               | (1.01 - 1.09)   | 0.026    |
| Sex (M vs. F)           | 5.46               | (2.02 - 16.19)  | 0.001    |
| Number comorbidities    | 5.07               | (2.84 - 10.15)  | < 0.001  |
| Vaccinated (Yes vs. No) | 0.08               | (0.01 - 0.41)   | 0.009    |
| A*30 (Yes vs. No)       | 14.05              | (0.59 - 238.42) | 0.073    |

**Supplementary Table S22.** Multiple logistic regressions predicting deceased within the severe group, based on HLA allele B\*18, adjusted for age, sex, number of comorbidities, and vaccination.

|                         | <b>OR adjusted</b> | <b>(95% CI)</b> | <b>p</b> |
|-------------------------|--------------------|-----------------|----------|
| Age (years)             | 1.04               | (1.01 - 1.09)   | 0.032    |
| Sex (M vs. F)           | 5.56               | (2.08 - 16.41)  | 0.001    |
| Number comorbidities    | 4.84               | (2.75 - 9.58)   | < 0.001  |
| Vaccinated (Yes vs. No) | 0.13               | (0.02 - 0.55)   | 0.014    |
| B*18 (Yes vs. No)       | 1.46               | (0.36 - 5.98)   | 0.597    |

**Supplementary Table S23.** Multiple logistic regressions predicting deceased within the severe group, based on HLA allele C\*07, adjusted for age, sex, number of comorbidities, and vaccination.

|                      | <b>OR adjusted</b> | <b>(95% CI)</b> | <b>p</b> |
|----------------------|--------------------|-----------------|----------|
| Age (years)          | 1.04               | (1 - 1.08)      | 0.042    |
| Sex (M vs. F)        | 5.17               | (1.91 - 15.34)  | 0.002    |
| Number comorbidities | 5.09               | (2.88 - 10.06)  | < 0.001  |

|                         |      |               |       |
|-------------------------|------|---------------|-------|
| Vaccinated (Yes vs. No) | 0.13 | (0.02 - 0.55) | 0.013 |
| C*07 (Yes vs. No)       | 1.54 | (0.49 - 4.85) | 0.456 |

**Supplementary Table S24.** Multiple logistic regressions predicting deceased within the severe group, based on HLA allele DRB1\*11, adjusted for age, sex, number of comorbidities, and vaccination.

|                         | OR adjusted | (95% CI)      | p       |
|-------------------------|-------------|---------------|---------|
| Age (years)             | 1.04        | (1.01 - 1.09) | 0.033   |
| Sex (M vs. F)           | 5.54        | (2.08 - 16.3) | < 0.001 |
| Number comorbidities    | 5.01        | (2.83 - 9.86) | < 0.001 |
| Vaccinated (Yes vs. No) | 0.13        | (0.02 - 0.54) | 0.013   |
| DRB1*11 (Yes vs. No)    | 0.89        | (0.21 - 3.56) | 0.874   |

**Supplementary Table S25.** Multiple logistic regressions predicting deceased, or ICU stay within severe group, based on HLA allele A\*03, adjusted for age, sex, and number of comorbidities.

|                         | OR adjusted | (95% CI)      | p       |
|-------------------------|-------------|---------------|---------|
| Age (years)             | 1.06        | (1.03 - 1.1)  | < 0.001 |
| Sex (M vs. F)           | 3.99        | (1.7 - 9.81)  | 0.002   |
| Number comorbidities    | 5.83        | (3.2 - 11.75) | < 0.001 |
| Vaccinated (Yes vs. No) | 0.32        | (0.12 - 0.81) | 0.019   |
| A*03 (Yes vs. No)       | 0.14        | (0.02 - 0.77) | 0.036   |

**Supplementary Table S26.** Multiple logistic regressions predicting deceased, or ICU stay within severe group, based on HLA allele C\*04, adjusted for age, sex, and number of comorbidities.

|                         | OR adjusted | (95% CI)       | p       |
|-------------------------|-------------|----------------|---------|
| Age (years)             | 1.06        | (1.02 - 1.1)   | < 0.001 |
| Sex (M vs. F)           | 4.41        | (1.9 - 10.79)  | < 0.001 |
| Number comorbidities    | 5.57        | (3.08 - 11.12) | < 0.001 |
| Vaccinated (Yes vs. No) | 0.36        | (0.14 - 0.9)   | 0.032   |
| C*04 (Yes vs. No)       | 0.48        | (0.15 - 1.5)   | 0.218   |

**Supplementary Table S27.** Multiple logistic regressions predicting deceased, or ICU stay within severe group, based on HLA allele DQB1\*06, adjusted for age, sex, and number of comorbidities.

|                      | OR adjusted | (95% CI)       | p       |
|----------------------|-------------|----------------|---------|
| Age (years)          | 1.06        | (1.03 - 1.1)   | < 0.001 |
| Sex (M vs. F)        | 4.27        | (1.83 - 10.46) | 0.001   |
| Number comorbidities | 5.59        | (3.1 - 11.08)  | < 0.001 |

|                         |      |                |       |
|-------------------------|------|----------------|-------|
| Vaccinated (Yes vs. No) | 0.34 | (0.13 - 0.87)  | 0.027 |
| DQB1*06 (Yes vs. No)    | 3.2  | (0.95 - 11.46) | 0.065 |

**Supplementary Table S28.** Multiple logistic regressions predicting oxygen therapy within the severe group, based on HLA allele A\*03, adjusted for age, sex, number of comorbidities, and vaccination.

|                         | OR adjusted | (95% CI)      | p       |
|-------------------------|-------------|---------------|---------|
| Age (years)             | 1.09        | (1.05 - 1.12) | < 0.001 |
| Sex (M vs. F)           | 1.24        | (0.59 - 2.61) | 0.565   |
| Number comorbidities    | 1.05        | (0.7 - 1.61)  | 0.803   |
| Vaccinated (Yes vs. No) | 0.22        | (0.1 - 0.49)  | < 0.001 |
| A*03 (Yes vs. No)       | 0.26        | (0.07 - 0.85) | 0.032   |

**Supplementary Table S29.** Multiple logistic regressions predicting oxygen therapy within the severe group, based on HLA allele DQB1\*02, adjusted for age, sex, number of comorbidities, and vaccination.

|                         | OR adjusted | (95% CI)      | p       |
|-------------------------|-------------|---------------|---------|
| Age (years)             | 1.09        | (1.06 - 1.13) | < 0.001 |
| Sex (M vs. F)           | 1.16        | (0.55 - 2.45) | 0.693   |
| Number comorbidities    | 1.05        | (0.69 - 1.6)  | 0.835   |
| Vaccinated (Yes vs. No) | 0.25        | (0.11 - 0.54) | < 0.001 |
| DQB1*02 (Yes vs. No)    | 0.31        | (0.13 - 0.7)  | 0.006   |
